# Supplementary material for: Permanent diabetes during the first year of life: multiple gene screening in 54 patients
Source: PubMed Central journal article supplement — Diabetologia. 2011 Mar 10;54(7):1693–701. doi: 10.1007/s00125-011-2094-8 (PMC3110270; doi:10.1007/s00125-011-2094-8), 2011-03-10
Supplement: 125_2011_2094_MOESM1_ESM.pdf [file 125_2011_2094_MOESM1_ESM.pdf]

**Electronic supplementary material****ESM Table 1** PCR and sequencing conditions for candidate gene screening

| <b>Fragment</b> | <b>Oligos</b>                     | <b>PCR cycles (35×)</b>            | <b>Sequencing</b> | <b>SNPs [ref. no.]</b> |
|-----------------|-----------------------------------|------------------------------------|-------------------|------------------------|
| <i>ERN1</i> ex1 | 5' gcctagtcagttctgcgtccg 3' (for) | 94°C: 30 s; 58°C: 60 s; 72°C: 45 s | M13for            |                        |
|                 | 5' actcccgtcaggaagctctc 3' (rev)  |                                    |                   |                        |
| <i>ERN1</i> ex2 | 5' gtgattgtacatgcccaagg 3' (for)  | 94°C: 30 s; 58°C: 60 s; 72°C: 45 s | M13for            |                        |
|                 | 5' taagcaaatgtccatgtcgc 3' (rev)  |                                    |                   |                        |
| <i>ERN1</i> ex3 | 5' ggagggagaaagttattaccg 3' (for) | 94°C: 30 s; 54°C: 60 s; 72°C: 45 s | M13for            |                        |
|                 | 5' catatatgcactcccagcaac 3' (rev) |                                    |                   |                        |
| <i>ERN1</i> ex4 | 5' cctccatcatgggtttgc 3' (for)    | 94°C: 30 s; 60°C: 60 s; 72°C: 45 s | M13for            |                        |
|                 | 5' gaccgctggtctagaacc 3' (rev)    |                                    |                   |                        |
| <i>ERN1</i> ex5 | 5' tcctttgtattcagttagg 3' (for)   | 94°C: 30 s; 58°C: 60 s; 72°C: 45 s | M13for            |                        |
|                 | 5' ccactttcccagattcc 3' (rev)     |                                    |                   |                        |
| <i>ERN1</i> ex6 | 5' tccataggtgtaaacgacg 3' (for)   | 94°C: 30 s; 58°C: 60 s; 72°C: 45 s | M13for            |                        |
|                 | 5' atcttctggaaacaggcagg 3' (rev)  |                                    |                   |                        |
| <i>ERN1</i> ex7 | 5' tgtctgggccttcagttctcc 3' (for) | 94°C: 30 s; 58°C: 60 s; 72°C: 45 s | M13for            |                        |
|                 | 5' ctgcacattgactgtgggaag 3' (rev) |                                    |                   |                        |
| <i>ERN1</i> ex8 | 5' aagatggggtgagactcagc 3' (for)  | 94°C: 30 s; 58°C: 60 s; 72°C: 45 s | M13for            |                        |
|                 | 5' acagcaccagaacacgaagg 3' (rev)  |                                    |                   |                        |

| <b>Fragment</b>  | <b>Oligos</b>                                                          | <b>PCR cycles (35×)</b>            | <b>Sequencing</b> | <b>SNPs [ref. no.]</b> |
|------------------|------------------------------------------------------------------------|------------------------------------|-------------------|------------------------|
| <i>ERN1</i> ex9  | 5' atgattactcccttctgtgg 3' (for)<br>5' atggaacagaagtggtagg 3' (rev)    | 94°C: 30 s; 58°C: 60 s; 72°C: 45 s | M13for            |                        |
| <i>ERN1</i> ex10 | 5' cagtgctgggatgggtgc 3'(for)<br>5' cagcacgctgtcacctcagg 3' (rev)      | 94°C: 30 s; 58°C: 60 s; 72°C: 45 s | M13for            | rs187826               |
| <i>ERN1</i> ex11 | 5' gagagtttcattgtggacce 3' (for)<br>5' taggctgcaagctcagaaggc 3'(rev)   | 94°C: 30 s; 58°C: 60 s; 72°C: 45 s | M13for            |                        |
| <i>ERN1</i> ex12 | 5' ccctgcagtacagtcatatcc 3' (for)<br>5' ctactgacatgaggcgacag 3' (rev)  | 94°C: 30 s; 58°C: 60 s; 72°C: 45 s | M13for            |                        |
| <i>ERN1</i> ex13 | 5' tggctctttgtgccctgtt 3' (for)<br>5' agactcctggacttctcagg 3' (rev)    | 94°C: 30 s; 58°C: 60 s; 72°C: 45 s | M13for            |                        |
| <i>ERN1</i> ex14 | 5' tgagtcaggaagcttgcac 3' (for)<br>5' tgcgtctagtcactgctttg 3' (rev)    | 94°C: 30 s; 58°C: 60 s; 72°C: 45 s | M13for            |                        |
| <i>ERN1</i> ex15 | 5' atgctgtggaccaggttctc 3' (for)<br>5' tggctcaaaactcctgagctc 3' (rev)  | 94°C: 30 s; 60°C: 60 s; 72°C: 45 s | M13for            |                        |
| <i>ERN1</i> ex16 | 5' aaagtgagccgaggggccaag 3' (for)<br>5' gcttgaacagaagcaaggccc 3' (rev) | 94°C: 30 s; 58°C: 60 s; 72°C: 45 s | M13for            |                        |
| <i>ERN1</i> ex17 | 5' aacatttgaggtggcggcag 3' (for)<br>5' cctgaagatacaatgggctgg 3' (rev)  | 94°C: 30 s; 58°C: 60 s; 72°C: 45   | M13for            |                        |

| <b>Fragment</b>     | <b>Oligos</b>                                                          | <b>PCR cycles (35×)</b>            | <b>Sequencing</b> | <b>SNPs [ref. no.]</b>                        |
|---------------------|------------------------------------------------------------------------|------------------------------------|-------------------|-----------------------------------------------|
| <i>ERN1</i> ex18    | 5' caccttctaggtggcagaagc 3' (for)<br>5' tgagtgcaaaggtggcaccag 3' (rev) | 94°C: 30 s; 58°C: 60 s; 72°C: 45 s | M13for            |                                               |
| <i>ERN1</i> ex19    | 5' ataatgagagggtgtgcagc 3' (for)<br>5' tccagtttaggtaatgggc 3' (rev)    | 94°C: 30 s; 58°C: 60 s; 72°C: 45 s | M13for            | rs196923                                      |
| <i>ERN1</i> ex20    | 5' gggcaggcttatgtgcagtg 3' (for)<br>5' acagcctggagcggccatttc 3' (rev)  | 94°C: 30 s; 58°C: 60 s; 72°C: 45 s | M13for            |                                               |
| <i>ERN1</i> ex21    | 5' atgcctaggtgtggagtgacc 3' (for)<br>5' tgaagccgctagctcctg 3' (rev)    | 94°C: 30 s; 58°C: 60 s; 72°C: 45 s | M13for            |                                               |
| <i>ERN1</i> ex22    | 5' tggctgggccttgctcacttc 3' (for)<br>5' gcaaagccgggagcatcaag 3' (rev)  | 94°C: 30 s; 58°C: 60 s; 72°C: 45 s | M13for            | rs196912<br>c.2837 G>A p.946 R>Q <sup>a</sup> |
| <i>NKX6-1</i> ex1.1 | 5' gctgcaaggctacggtctccg 3' (for)<br>5' ggaggcagaggcggacgagg 3' (rev)  | 94°C: 30 s; 67°C: 60 s; 72°C: 60 s | M13for            |                                               |
| <i>NKX6-1</i> ex1.2 | 5' ccgcctcgcctccggttc 3' (for)<br>5' aggcacggcaggcaggcatcg 3' (rev)    | 94°C: 30 s; 67°C: 60 s; 72°C: 60 s | M13for            | c.462 G>A (p.=) <sup>a</sup>                  |
| <i>NKX6-1</i> ex2   | 5' agtctggaagcggcactacac 3' (for)<br>5' ttgattcgcacctcccagge 3' (rev)  | 94°C: 30s; 67°C: 60 s; 72°C: 60 s  | M13for            |                                               |

| <b>Fragment</b>   | <b>Oligos</b>                                                         | <b>PCR cycles (35×)</b>             | <b>Sequencing</b> | <b>SNPs [ref. no.]</b> |
|-------------------|-----------------------------------------------------------------------|-------------------------------------|-------------------|------------------------|
| <i>NKX6-1</i> ex3 | 5' agcatggcctggatctgctcg 3' (for)<br>5' tcccctcccacaactcaagg 3' (rev) | 94°C: 30 s; 58°C: 60 s; 72°C: 60 s  | M13for            |                        |
| <i>NEUROG3</i>    | 5' gtgacggactcaaacttacc 3' (for)<br>5' ctcccttacccttagcacc 3' (rev)   | 94°C: 30 s; 56°C: 60 s; 72°C: 90 s  | M13for            | rs4536103 [1] p.199F>S |
| <i>CDK4</i> ex2-3 | 5' tgttgctgcaggctcatacc 3' (for)<br>5' aggcaccatacctgaaatcc 3' (rev)  | 94°C: 30 s; 60°C: 60 s; 72°C: 60 s  | M13for            |                        |
| <i>CDK4</i> ex4-5 | 5' gggacctttgtagtagaacc 3' (for)<br>5' tgggcaaggtatggatgtgg 3' (rev)  | 94°C: 30 s; 60°C: 60 s; 72°C: 60 s  | M13for            |                        |
| <i>CDK4</i> ex6-7 | 5' aagtgctggaattgttgcc 3' (for)<br>5' cattaaccacagtggccagg 3' (rev)   | 94°C: 30 s; 60°C: 60 s; 72°C: 60 s  | M13for            |                        |
| <i>CDK4</i> ex8   | 5' catcccaggtattgttgg 3' (for)<br>5' catagcctcagagataaagg 3' (rev)    | 94°C: 30 s; 60°C: 60 s; 72°C: 60 s  | M13for            |                        |
| <i>CHGA</i> ex1   | 5' gatcgaccgacagacggacg 3' (for)<br>5' cccgaaggaagtgtggagg 3' (rev)   | 94°C: 30' s; 56°C: 60 s; 72°C: 45 s | M13for            |                        |

| <b>Fragment</b>   | <b>Oligos</b>                                                        | <b>PCR cycles (35×)</b>            | <b>Sequencing</b> | <b>SNPs [ref. no.]</b> |
|-------------------|----------------------------------------------------------------------|------------------------------------|-------------------|------------------------|
| <i>CHGA</i> ex2   | 5' ggggtggcattgggtgaacg 3' (for)<br>5' acttactcctgcagctgccc 3' (rev) | 94°C: 30 s; 56°C: 60 s; 72°C: 45 s | M13for            |                        |
| <i>CHGA</i> ex3   | 5' agccagggatcatggactcc 3' (for)<br>5' ccacacacccatgtcctagc 3' (rev) | 94°C: 30 s; 56°C: 60 s; 72°C: 45 s | M13for            |                        |
| <i>CHGA</i> ex4   | 5' tcttgctgccaccaccctgg 3' (for)<br>5' agtcccagagaggaactgc 3' (rev)  | 94°C: 30 s; 56°C: 60 s; 72°C: 45 s | M13for            |                        |
| <i>CHGA</i> ex5   | 5' tgtgccagcttacagatgg 3' (for)<br>5' aacctgggtccatcatagc 3' (rev)   | 94°C: 30 s; 56°C: 60 s; 72°C: 45 s | M13for            |                        |
| <i>CHGA</i> ex6.1 | 5' gaaattagcctgtggggagg 3' (for)<br>5' ttctctctgtccaccagacc 3' (rev) | 94°C; 30 s; 56°C: 60 s; 72°C: 45 s | M13for            |                        |
| <i>CHGA</i> ex6.2 | 5' cccaccctccagccagcctc 3' (for)<br>5' tatggagaaggctctcctcc 3' (rev) | 94°C: 30 s; 56°C: 60 s; 72°C: 45 s | M13for            | rs9658655 [2] p.264E>D |
| <i>CHGA</i> ex7.1 | 5' caggagatggcagagactgg 3' (for)<br>5' agccgettctcagccgtcag 3' (rev) | 94°C: 30 s; 56°C: 60 s; 72°C: 45 s | M13for            | rs9658664 p.315G>S     |
| <i>CHGA</i> ex7.2 | 5' ggaggagcggctctccaagg 3' (for)<br>5' ggggcagtgtgtctgggtgc 3' (rev) | 94°C: 30 s; 56°C: 60 s; 72°C: 45 s | M13for            | rs729940 [3] p.399R>W  |
| <i>CHGA</i> ex8   | 5' ctaaccagcgcctttctgg 3' (for)<br>5' ccctaccggaagcagcatcc 3' (rev)  | 94°C: 30 s; 56°C: 60 s; 72°C: 45 s | M13for            | rs941581               |

| Fragment          | Oligos                                                              | PCR cycles (35×)                   | Sequencing | SNPs [ref. no.]                                                         |
|-------------------|---------------------------------------------------------------------|------------------------------------|------------|-------------------------------------------------------------------------|
| <i>CHGB</i> ex1   | 5' aggaggcacgctggtttcc 3' (for)<br>5' cgggtgggaggagctgaagg 3' (rev) | 94°C: 30 s; 56°C: 60 s; 72°C: 45 s | M13for     |                                                                         |
| <i>CHGB</i> ex2   | 5' ttctctcccccaatctgg 3' (for)<br>5' tgaagacccaagtctctcc (rev)      | 94°C: 30 s; 56°C: 60 s; 72°C: 45 s | M13rev     |                                                                         |
| <i>CHGB</i> ex3   | 5' agtcccctcctgtctgtgg 3' (for)<br>5' gggactgggagaatctagag 3' (rev) | 94°C: 30 s; 56°C: 60 s; 72°C: 45 s | M13for     |                                                                         |
| <i>CHGB</i> ex4   | 5' ttcttgacagcagctctgg 3' (for)<br>5' gtagaaggtgatgtggagg 3' (rev)  | 94°C: 30 s; 56°C: 60 s; 72°C: 45 s | M13for     |                                                                         |
| <i>CHGB</i> ex5.1 | 5' aggctggtgcttgtggaacc 3' (for)<br>5' cttcagagacttggtgtcg 3' (rev) | 94°C: 30 s; 56°C: 60 s; 72°C: 45 s | M13for     | rs6085324 p.93S>T<br>GA035261                                           |
| <i>CHGB</i> ex5.2 | 5' cacagagaaatgggcagagg 3' (for)<br>5' gtcttctcctgagaatgcc 3' (rev) | 94°C; 30 s; 56°C: 60 s; 72°C: 45 s | M13for     | rs910122 [4] p.178R>Q<br>rs881118 [4] p.200N>H<br>rs236151 [4] p.243T>A |

| <b>Fragment</b>    | <b>Oligos</b>                                                         | <b>PCR cycles (35×)</b>            | <b>Sequencing</b> | <b>SNPs [ref. no.]</b>                                       |
|--------------------|-----------------------------------------------------------------------|------------------------------------|-------------------|--------------------------------------------------------------|
| <i>CHGB</i> ex5.3  | 5' ggagttagtgccagatcgg 3' (for)<br>5' caactctcctcactctgagg 3' (rev)   | 94°C: 30 s; 56°C: 60 s; 72°C: 45 s | M13for            | rs73894084 p.258R>Q<br>rs236152 [4] p.353A>G<br>rs236153 [4] |
| <i>CHGB</i> ex5.4  | 5' tggagtgggagcgcctatagg 3' (for)<br>5' ggagagggtcgtagtatggg 3' (rev) | 94°C: 30 s; 56°C: 60 s; 72°C: 45 s | M13for            | rs742710 [4] p.413P>L<br>rs742711 [4, 5] p.417R>H            |
| <i>CHGB</i> ex5.5  | 5' tagtcccatcacacagctg 3' (for)<br>5' ttcccaccaatttctccccg 3' (rev)   | 94°C: 30 s; 56°C: 60 s; 72°C: 45 s | M13for            |                                                              |
| <i>CHGB</i> ex6    | 5' aatgcagcttctaacatgcc 3' (for)<br>5' acagatcatgtgatggctgc 3' (rev)  | 94°C; 30 s; 52°C; 60 s; 72°C: 45 s | M13for            |                                                              |
| <i>CACNA1C</i> ex1 | 5' aggagggattaatccagacc 3' (for)<br>5' acaggaaacacatgctctgg 3' (rev)  | 94°C; 30 s; 60°C: 60 s; 72°C: 60 s | M13for            |                                                              |
| <i>CACNA1C</i> ex2 | 5' ccagagagtgtcgggaagtgc 3' (for)<br>5' acagetgacacagctcgtgg 3' (rev) | 94°C: 30 s; 56°C: 60 s; 72°C: 60 s | M13for            |                                                              |
| <i>CACNA1C</i> ex3 | 5' tcagaatacaaggggcttgg 3' (for)<br>5' tgatctgaacgcagttctcc 3' (rev)  | 94°C: 30 s; 56°C: 60 s; 72°C: 60 s | M13for            |                                                              |
| <i>CACNA1C</i> ex4 | 5' ctactggttccaaacttcc 3' (for)<br>5' gtggccgtctgacaacgacc 3' (rev)   | 94°C: 30 s; 56°C: 60 s; 72°C: 60 s | M13for            | rs1544514                                                    |

| <b>Fragment</b>     | <b>Oligos</b>                                                        | <b>PCR cycles (35×)</b>            | <b>Sequencing</b> | <b>SNPs [ref. no.]</b>       |
|---------------------|----------------------------------------------------------------------|------------------------------------|-------------------|------------------------------|
| <i>CACNA1C</i> ex5  | 5' ctgtatccagaggtcagagc 3' (for)<br>5' gcaattcagcaaaggacagc 3' (rev) | 94°C: 30 s; 56°C: 60 s; 72°C: 60 s | M13for            | c.618 G>A (p.=) <sup>a</sup> |
| <i>CACNA1C</i> ex6  | 5' ttgcatgagatggcgtcagc 3' (for)<br>5' atgttggtgtagccagcagc 3' (rev) | 94°C: 30 s; 56°C: 60s; 72°C: 60 s  | M13for            |                              |
| <i>CACNA1C</i> ex7  | 5' catcaacctcatctgtcac 3' (for)<br>5' ggagaaagggaggtgtcagg 3' (rev)  | 94°C: 30 s; 56°C: 60 s; 72°C: 60 s | M13for            |                              |
| <i>CACNA1C</i> ex8  | 5' cccaatctgctcacacctgc 3' (for)<br>5' ggcatgtacggagtggaacc 3' (rev) | 94°C: 30 s; 56°C: 60 s; 72°C: 60 s | M13for            |                              |
| <i>CACNA1C</i> ex9  | 5' tgggtcagtgctcgggagc 3' (for)<br>5' agaatacagccaggaatagc 3' (rev)  | 94°C: 30 s; 56°C: 60 s; 72°C: 60 s | M13for            |                              |
| <i>CACNA1C</i> ex10 | 5' ctcttatctccatctctcc 3' (for)<br>5' gtcaaagttctgtgctgacc 3' (rev)  | 94°C: 30 s; 60°C: 60 s; 72°C: 60 s | M13for            |                              |
| <i>CACNA1C</i> ex11 | 5' ctatgtgaaagctgagttcc 3' (for)<br>5' tccattcagctctggatgc 3' (rev)  | 94°C: 30 s; 60°C: 60 s; 72°C: 60 s | M13for            |                              |
| <i>CACNA1C</i> ex12 | 5' ggcgtgttgcaaactactgc 3' (for)<br>5' ctgtgattccagatgcagc 3' (rev)  | 94°C: 30 s; 60°C: 60 s; 72°C: 60 s | M13for            |                              |
| <i>CACNA1C</i> ex13 | 5' tgacctgggagagaagcagc 3' (for)<br>5' cagctcagcgttgtaaagg 3' (rev)  | 94°C: 30 s; 56°C: 60 s; 72°C: 60 s | M13for            |                              |



| <b>Fragment</b>     | <b>Oligos</b>                                                        | <b>PCR cycles (35×)</b>            | <b>Sequencing</b> | <b>SNPs [ref. no.]</b> |
|---------------------|----------------------------------------------------------------------|------------------------------------|-------------------|------------------------|
| <i>CACNA1C</i> ex14 | 5' tttccctgggactgttgacc 3' (for)<br>5' ggcaactgtaggtattacc 3' (rev)  | 94°C: 30 s; 60°C: 60 s; 72°C: 60 s | M13for            |                        |
| <i>CACNA1C</i> ex15 | 5' ggtgctgcatcttgggttg 3' (for)<br>5' ccgaccattggctgctttcc 3' (rev)  | 94°C: 30 s; 60°C: 60 s; 72°C: 60 s | M13rev            |                        |
| <i>CACNA1C</i> ex16 | 5' gttctggccgaggtgatgg 3' (for)<br>5' cctctggaagaacttctcc 3' (rev)   | 94°C: 30 s; 60°C: 60 s; 72°C: 60 s | M13rev            |                        |
| <i>CACNA1C</i> ex17 | 5' gtgagaatgaggcacgatgg 3' (for)<br>5' gtgcagcttcccacactcc 3' (rev)  | 94°C: 30 s; 60°C: 60 s; 72°C: 60 s | M13for            |                        |
| <i>CACNA1C</i> ex18 | 5' caattttgttgacgtagtg 3' (for)<br>5' cccgtttggcactgtgctgc 3' (rev)  | 94°C: 30 s; 60°C: 60 s; 72°C: 60 s | M13for            |                        |
| <i>CACNA1C</i> ex19 | 5' gaggagctctaccctgcacg 3' (for)<br>5' caccagtgggaagacattcc 3' (rev) | 94°C: 30 s; 60°C: 60 s; 72°C: 60 s | M13for            |                        |
| <i>CACNA1C</i> ex20 | 5' gtccctctactactgttcc 3' (for)<br>5' tcttccacaggttctgg 3' (rev)     | 94°C: 30 s; 60°C: 60 s; 72°C: 60 s | M13for            | rs215976 [6]           |
| <i>CACNA1C</i> ex21 | 5' acttcaaggctactgcaagc 3' (for)<br>5' ggacactggaacctgggtcc 3' (rev) | 94°C: 30 s; 60°C: 60 s; 72°C: 60 s | M13for            |                        |
| <i>CACNA1C</i> ex22 | 5' catgtctgccagtaggaagg 3' (for)<br>5' acaggcaactgccaggctgg 3' (rev) | 94°C: 30 s; 60°C: 60 s; 72°C: 60 s | M13for            |                        |

| <b>Fragment</b>     | <b>Oligos</b>                                                        | <b>PCR cycles (35×)</b>            | <b>Sequencing</b> | <b>SNPs [ref. no.]</b>        |
|---------------------|----------------------------------------------------------------------|------------------------------------|-------------------|-------------------------------|
| <i>CACNA1C</i> ex23 | 5' agagccgactggtgcttccc 3' (for)<br>5' gtcagcaacagaagctgtgg 3' (rev) | 94°C: 30 s; 60°C: 60 s; 72°C: 60 s | M13for            |                               |
| <i>CACNA1C</i> ex24 | 5' ctggtgaacatccactgacc 3' (for)<br>5' gtgtgttagcgacagacagc 3' (rev) | 94°C: 30 s; 60°C: 60 s; 72°C: 60 s | M13for            |                               |
| <i>CACNA1C</i> ex25 | 5' gctgtctgtcgctaacacac 3' (for)<br>5' aagatccagccacacagagc 3' (rev) | 94°C: 30 s; 60°C: 60 s; 72°C: 60 s | M13for            |                               |
| <i>CACNA1C</i> ex26 | 5' ggatggtgcttgggactgc 3' (for)<br>5' ccactctcatcactgcgg 3' (rev)    | 94°C: 30 s; 60°C: 60 s; 72°C: 60 s | M13for            |                               |
| <i>CACNA1C</i> ex27 | 5' ttcacctgtcaggacattcc 3' (for)<br>5' cctcacctctgtggagctcc 3' (rev) | 94°C: 30 s; 60°C: 60 s; 72°C: 60 s | M13for            |                               |
| <i>CACNA1C</i> ex28 | 5' cctcctggaaaggctcctgg 3' (for)<br>5' tggctcaggacactgtctcg 3' (rev) | 94°C; 30 s; 60°C; 60 s; 72°C: 60 s | M13for            |                               |
| <i>CACNA1C</i> ex29 | 5' agcacagtgtgggctatgg 3' (for)<br>5' tttctggtcaagcctccagc 3' (rev)  | 94°C: 30 s; 60°C: 60 s; 72°C: 60 s | M13for            |                               |
| <i>CACNA1C</i> ex30 | 5' ccagcattcaaggtcactgg 3' (for)<br>5' atgacctccagaggagtgc 3' (rev)  | 94°C: 30 s; 60°C: 60 s; 72°C: 60 s | M13for            | c.1913 C>T (p.=) <sup>a</sup> |
| <i>CACNA1C</i> ex31 | 5' ccagagetgtctctgcacc 3' (for)<br>5' acgatctcagtatctgcacg 3' (rev)  | 94°C: 30 s; 60°C: 60 s; 72°C: 60 s | M13for            |                               |

| <b>Fragment</b>     | <b>Oligos</b>                                                        | <b>PCR cycles (35×)</b>            | <b>Sequencing</b> | <b>SNPs [ref. no.]</b> |
|---------------------|----------------------------------------------------------------------|------------------------------------|-------------------|------------------------|
| <i>CACNA1C</i> ex32 | 5' tgtgtggtctcatcacatcc 3' (for)<br>5' aaagcgatgcactgagctgc 3' (rev) | 94°C: 30 s; 60°C: 60 s; 72°C: 60 s | M13for            |                        |
| <i>CACNA1C</i> ex33 | 5' caaggaaggtcttgctgagg 3' (for)<br>5' ctgccttcaatacctgcacc 3' (rev) | 94°C: 30 s; 60°C: 60 s; 72°C: 60 s | M13for            | rs216008 [6]           |
| <i>CACNA1C</i> ex34 | 5' gattctgatggtggtgttc 3' (for)<br>5' ggaatgaggagtttctctgg 3' (rev)  | 94°C: 30 s; 60°C: 60 s; 72°C: 60 s | M13for            |                        |
| <i>CACNA1C</i> ex35 | 5' tctctcccttttccatacc 3' (for)<br>5' aggcaaatgagtgttagagc 3' (rev)  | 94°C: 30 s; 60°C: 60 s; 72°C: 60 s | M13rev            |                        |
| <i>CACNA1C</i> ex36 | 5' cagccaagacctagaatacc 3' (for)<br>5' tggccacatgcagtgagagc 3' (rev) | 94°C: 30 s; 60°C: 60 s; 72°C: 60 s | M13for            |                        |
| <i>CACNA1C</i> ex37 | 5' aggtctgtatttctcggagg 3' (for)<br>5' ttgtgcagctgtgttctgg 3' (rev)  | 94°C: 30 s; 60°C: 60 s; 72°C: 60 s | M13for            | rs56180838 [7]         |
| <i>CACNA1C</i> ex38 | 5' ggctgcagagacagggatgc 3' (for)<br>5' ggacagtcaggaatgaaagg 3' (rev) | 94°C: 30 s; 60°C: 60 s; 72°C: 60 s | M13for            |                        |
| <i>CACNA1C</i> ex39 | 5' ctgagaccctgaagagacc 3' (for)<br>5' accaccaggccacagtgtgg 3' (rev)  | 94°C: 30 s; 60°C: 60 s; 72°C: 60 s | M13for            |                        |
| <i>CACNA1C</i> ex40 | 5' ggtggggagggatgcagagg 3' (for)<br>5' aactgggcagtcatggctgc 3' (rev) | 94°C: 30 s; 60°C: 60 s; 72°C: 60 s | M13for            |                        |

| <b>Fragment</b>     | <b>Oligos</b>                                                        | <b>PCR cycles (35×)</b>            | <b>Sequencing</b> | <b>SNPs [ref. no.]</b>                           |
|---------------------|----------------------------------------------------------------------|------------------------------------|-------------------|--------------------------------------------------|
| <i>CACNA1C</i> ex41 | 5' tggcttctgccatcagtagg 3' (for)<br>5' ctctgcaggtatggtcagc 3' (rev)  | 94°C: 30 s; 60°C: 60 s; 72°C: 60 s | M13for            |                                                  |
| <i>CACNA1C</i> ex42 | 5' ctgggctgctggcagagacc 3' (for)<br>5' gaaatgggcacttcacttc 3' (rev)  | 94°C: 30 s; 60°C: 60 s; 72°C: 60 s | M13for            |                                                  |
| <i>CACNA1C</i> ex43 | 5' aaccatatcactctgccagc 3' (for)<br>5' tcccttgagcactttgcagg 3' (rev) | 94°C: 30 s; 60°C: 60 s; 72°C: 60 s | M13for            |                                                  |
| <i>CACNA1C</i> ex44 | 5' aactgatgagtcagggttc 3' (for)<br>5' aagggtgccacagctggagg 3' (rev)  | 94°C: 30 s; 60°C: 60 s; 72°C: 60 s | M13for            |                                                  |
| <i>CACNA1C</i> ex45 | 5' caactgaattcccctgctcc 3' (for)<br>5' ggaggtcagaggcaatgacc 3' (rev) | 94°C: 30 s; 60°C: 60 s; 72°C: 60s  | M13for            |                                                  |
| <i>CACNA1C</i> ex46 | 5' cctggaggacaggtcttgg 3' (for)<br>5' ctttctctggtgcagctcc 3' (rev)   | 94°C: 30 s; 60°C: 60 s; 72°C: 60 s | M13for            |                                                  |
| <i>CACNA1C</i> ex47 | 5' ctgtggaggctgctctctgg 3' (for)<br>5' ctgagggttcagcacgtgg 3' (rev)  | 94°C: 30 s; 60°C: 60 s; 72°C: 60 s | M13for            | rs72552065 [7]                                   |
| <i>CACNA1C</i> ex48 | 5' ctggaggtcttgactgtacc 3' (for)<br>5' tggatggacactttccagg 3' (rev)  | 94°C: 30 s; 60°C: 60 s; 72°C: 60 s | M13for            |                                                  |
| <i>CACNA1C</i> ex49 | 5' atgcaaggtctatagaaagc 3' (for)<br>5' tatgacacctgggtctttgg 3' (rev) | 94°C: 30 s; 60°C: 60 s; 72°C: 60 s | M13for            | rs71441836 p.1820P>L<br>rs10774053 [7] p.1821M>V |

| Fragment            | Oligos                                                               | PCR cycles (35×)                   | Sequencing | SNPs [ref. no.]                    |
|---------------------|----------------------------------------------------------------------|------------------------------------|------------|------------------------------------|
| <i>CACNA1C</i> ex50 | 5' gtacacctgcatgtgtgtgc 3' (for)<br>5' gagggatctcagggacctgc 3' (for) | 94°C: 30 s; 60°C: 60 s; 72°C: 60 s | M13for     |                                    |
| <i>CACNA1C</i> ex51 | 5' ccttcaactaaggatcagagc 3' (for)<br>5' ttccaatcatccctgacc 3' (rev)  | 94°C: 30 s; 60°C: 60 s; 72°C: 60 s | M13for     | rs72653441 p.1865K>E<br>rs56270948 |
| <i>CACNA1C</i> ex52 | 5' aaactgtcacaggccagtgc 3' (for)<br>5' ggattgtccgtcacctgg 3' (rev)   | 94°C: 30 s; 60°C: 60 s; 72°C: 60 s | M13for     |                                    |
| <i>CACNA1C</i> ex53 | 5' agtgcttgctcagaagcagg 3' (for)<br>5' ccaagtccccttggtgccc 3' (rev)  | 94°C: 30 s; 60°C: 60 s; 72°C: 60 s | M13for     |                                    |
| <i>CACNA1C</i> ex54 | 5' gggaagagctgggctccagg 3' (for)<br>5' ggtcacgagaacagtgagc 3' (rev)  | 94°C: 30 s; 60°C: 60 s; 72°C: 60 s | M13for     |                                    |

SNPs found during the screening have been previously described (in case of non-synonymous variation, alternate residues are indicated), except for: <sup>a</sup>SNPs newly described in our patients

References of papers describing SNPs found in this investigation are provided below

Primers and PCR conditions for the *FOXP3* gene were communicated to us by T.R. Torgenson, University of Washington School of Medicine, WA, USA

for, forward; rev, reverse; SNP, single nucleotide polymorphism

## References

1. Nocerino V, Colombo C, Bonfanti R, Iafusco D, Barbetti F. (2009) Mutations in IAPP and NEUROG3 genes are not a common cause of permanent neonatal/infancy/childhood-onset diabetes. *Diabet Med* 26:660–661.

2. Fung MM, Nguyen C, Mehtani P, et al. (2008) Genetic variation within adrenergic pathways determines in vivo effects of presynaptic stimulation in humans. *Circulation* 117:517–525.
3. Chen Y, Mahata M, Rao F, et al. (2009) Chromogranin A regulates renal function by triggering Weibel-Palade body exocytosis. *J Am Soc Nephrol* 20:1623–1632.
4. Ryu GM, Song P, Kim KW, et al. (2009) Genome-wide analysis to predict protein sequence variations that change phosphorylation sites or their corresponding kinases. *Nucleic Acids Res* 37:1297–1307.
5. Blasco H, Corcia P, Veyrat-Durebex C, et al. (2010) The P413L chromogranin B variation in French patients with sporadic amyotrophic lateral sclerosis. *Amyotroph Lateral Scler* doi:10.3109/17482968.2010.522587
6. Beitelshes AL, Navare H, Wang D, et al (2009). CACNA1C gene polymorphisms, cardiovascular disease outcomes, and treatment response. *Circ Cardiovasc Genet* 2:362–370.
7. Zhang T, Moss A, Cong P, et al; Long QT International Registry Investigators; HVP-China Investigators, Qi M LQTS gene LOVD database. (2010) *Hum Mutat* 31:E1801–E1810.
